# Supplementary material for: Nanolayered manganese oxide/C60composite: a good water-oxidizing catalyst for artificial photosynthetic systems
Source: Royal Society of Chemistry journal article supplement (doi:10.1039/c4dt00599f), 2014-01-01
Supplement: c4dt00599f1.pdf [file c4dt00599f1.pdf]

# Electronic Supplementary Information

# Nanolayered manganese oxide/C<sub>60</sub> composite: A good water-oxidizing catalyst for artificial photosynthetic systems

Mohammad Mahdi Najafpour<sup>a,b\*</sup>, Mahnaz Abasi<sup>a</sup>, Tatsuya Tomo<sup>c,d</sup>, and Suleyman I.

Allakhverdiev<sup>e,f</sup>

<sup>a</sup>*Department of Chemistry, Institute for Advanced Studies in Basic Sciences (IASBS), Zanjan, 45137-66731, Iran*

<sup>b</sup>*Center of Climate Change and Global Warming, Institute for Advanced Studies in Basic Sciences (IASBS), Zanjan, 45137-66731, Iran*

<sup>c</sup>*Department of Biology, Faculty of Science, Tokyo University of Science, Kagurazaka 1-3, Shinjuku-ku, Tokyo 162-8601, Japan*

<sup>d</sup>*PRESTO, Japan Science and Technology Agency (JST), 4-1-8 Honcho Kawaguchi, Saitama 332-0012, Japan*

<sup>e</sup>*Controlled Photobiosynthesis Laboratory, Institute of Plant Physiology, Russian Academy of Sciences, Botanicheskaya Street 35, Moscow 127276, Russia*

<sup>f</sup>*Institute of Basic Biological Problems, Russian Academy of Sciences, Pushchino, Moscow Region 142290, Russia*

\*Corresponding author; Phone: (+98) 241 415 3201; E-mail: [mmnajafpour@iasbs.ac.ir](mailto:mmnajafpour@iasbs.ac.ir)

## Contents

|                                           |       |
|-------------------------------------------|-------|
| FTIR Spectra .....                        | 4-6   |
| TEM Images .....                          | 7-13  |
| SEM Images .....                          | 14-26 |
| Oxygen evolution by C <sub>60</sub> ..... | 27    |

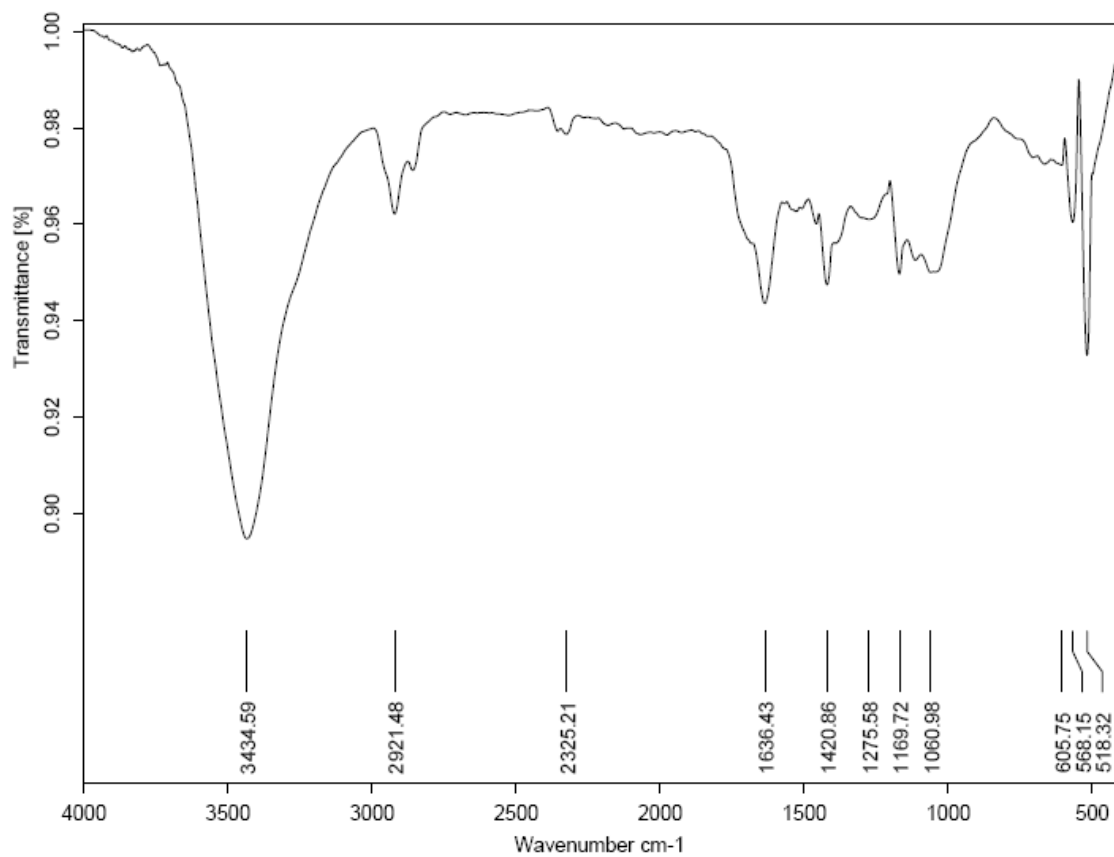

a

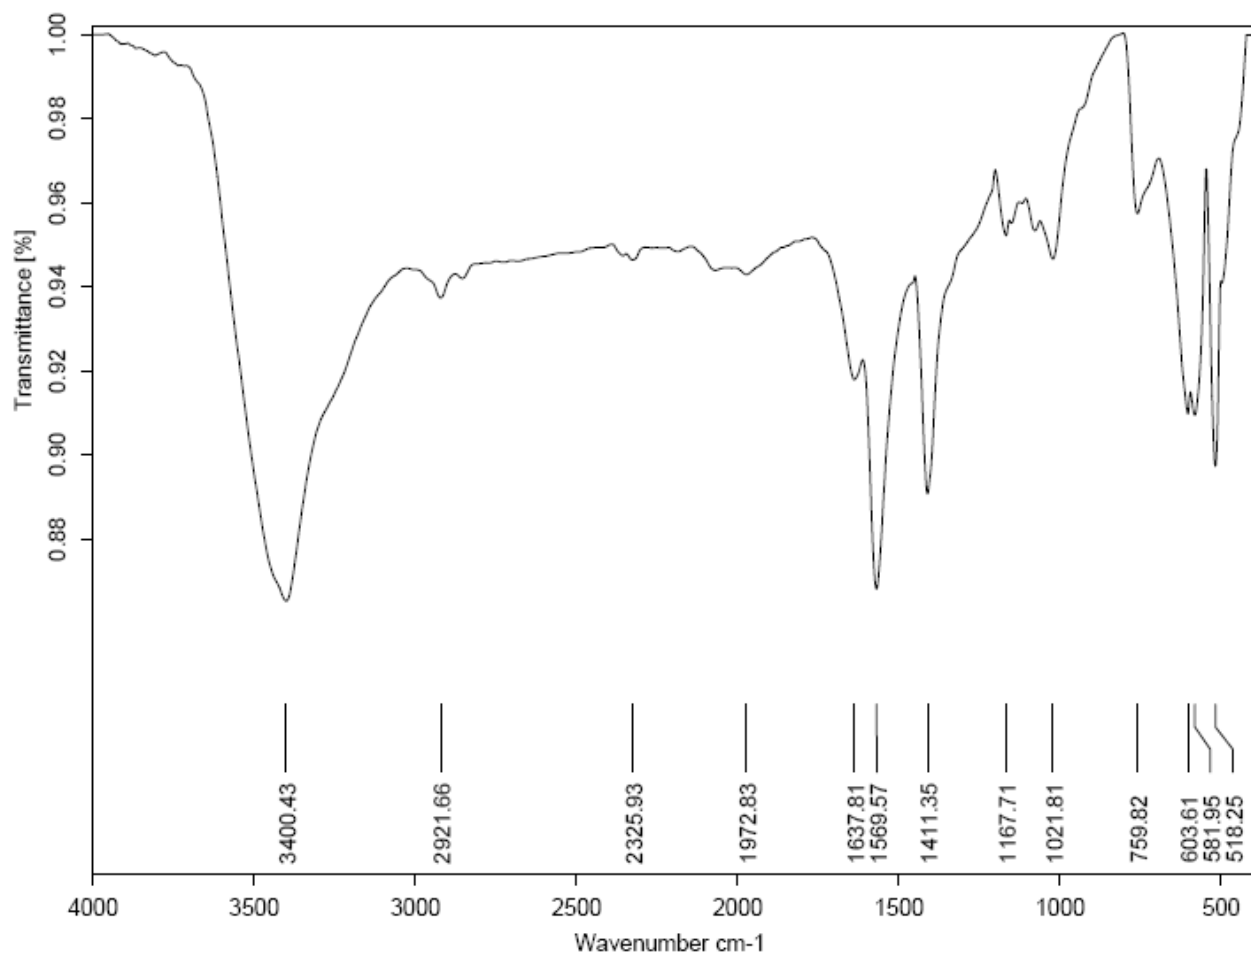

b

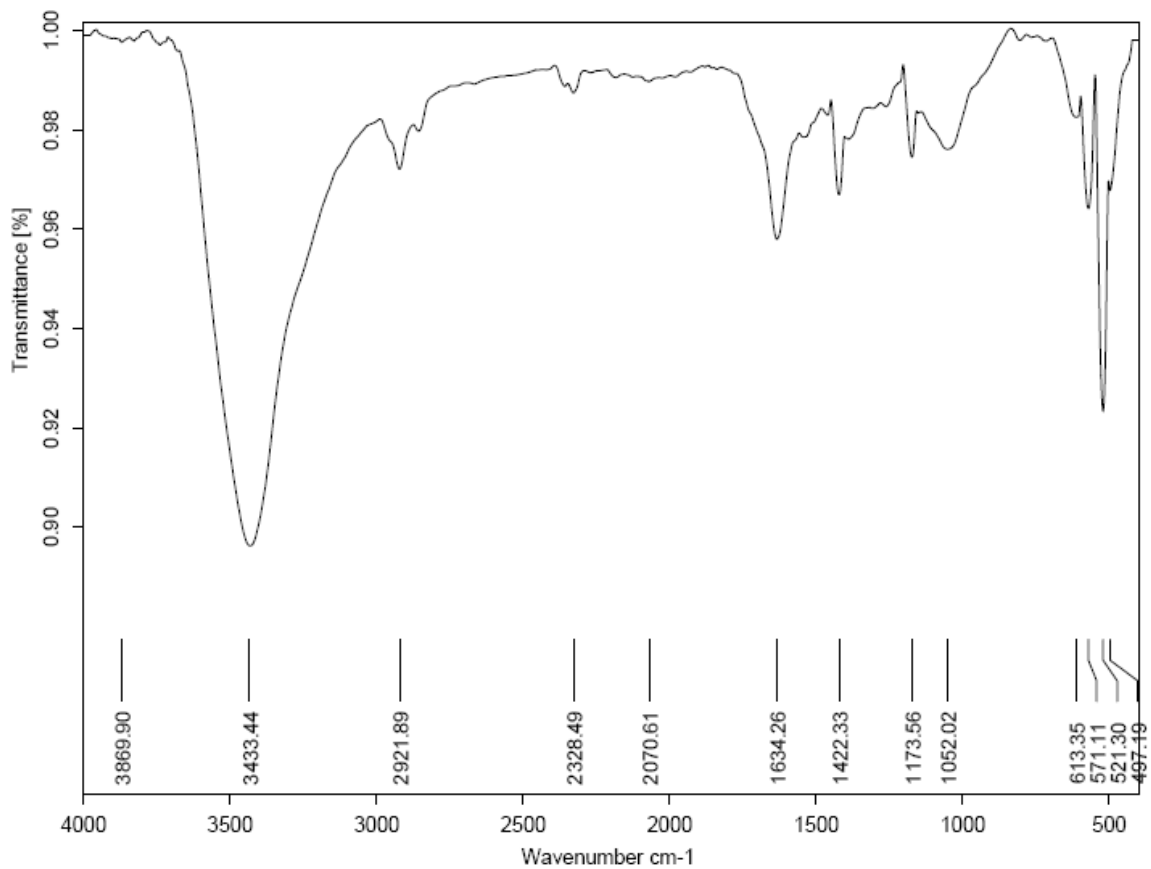

c

Fig. S1 FTIR spectra of C<sub>60</sub> (a), **1** (b) and **2** (c). A broad band at ~ 3200 - 3500 cm<sup>-1</sup> related to antisymmetric and symmetric O-H stretchings is observed. ~ 1630 cm<sup>-1</sup> is related to H-O-H bending. The absorption bands characteristic for a MnO<sub>6</sub> core in the region ~ 600 cm<sup>-1</sup> assigned to stretching vibrations of Mn-O bonds in Mn oxide was also observed in the FTIR spectra of **1**. However, peaks related to MnO<sub>6</sub> core were not observed for **2** because of low amounts of Mn oxide in the composite.

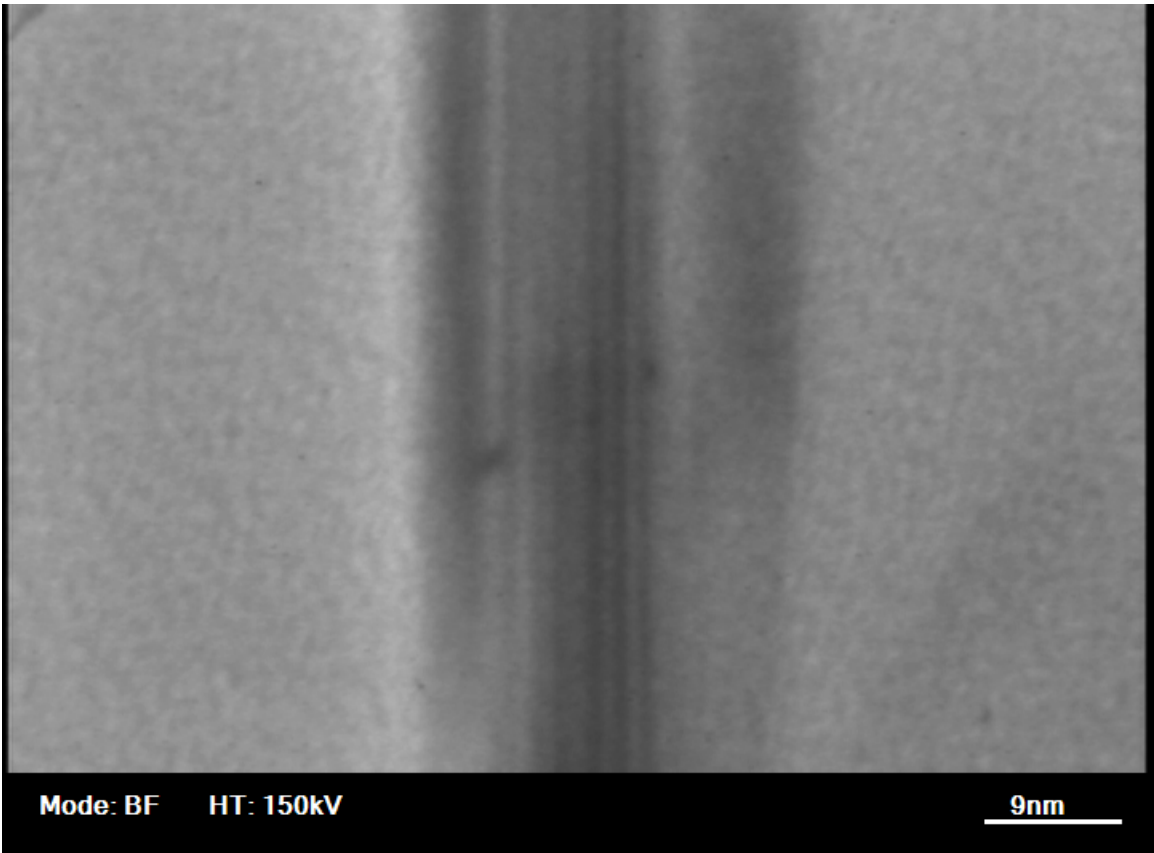

a

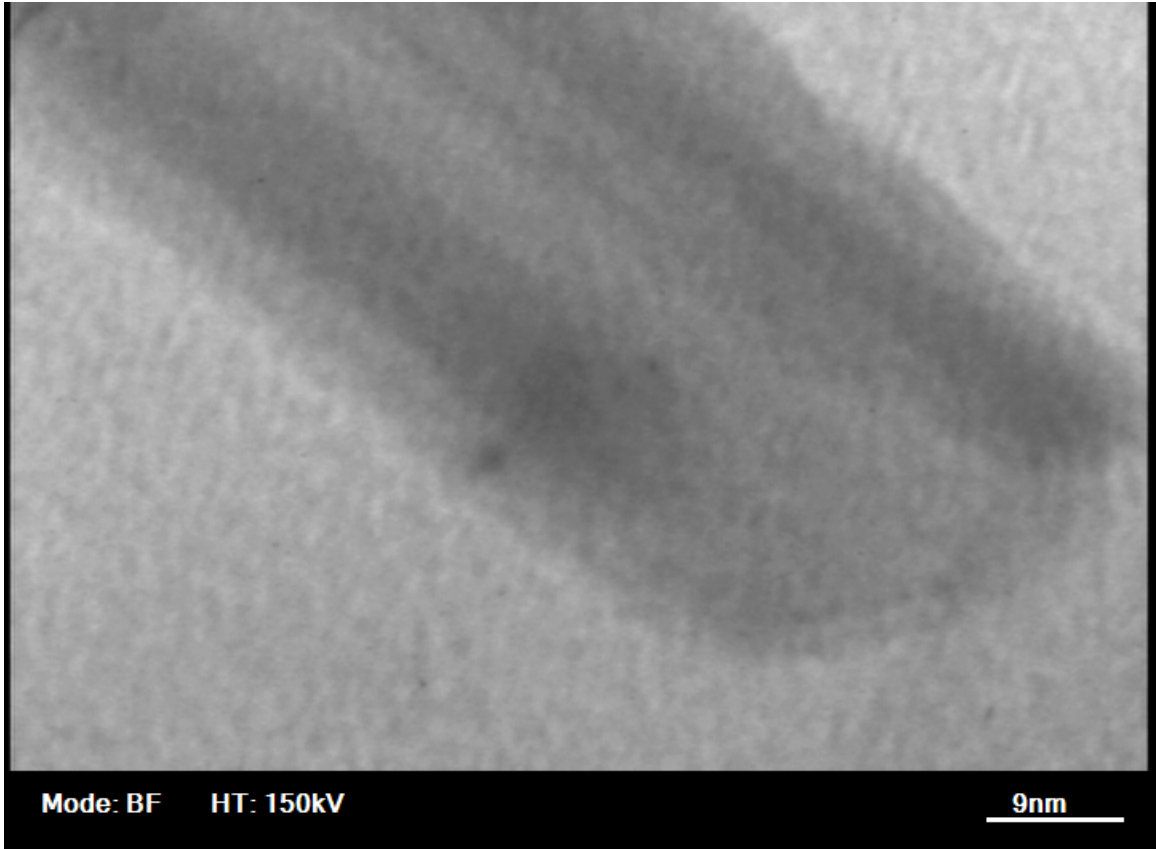

b



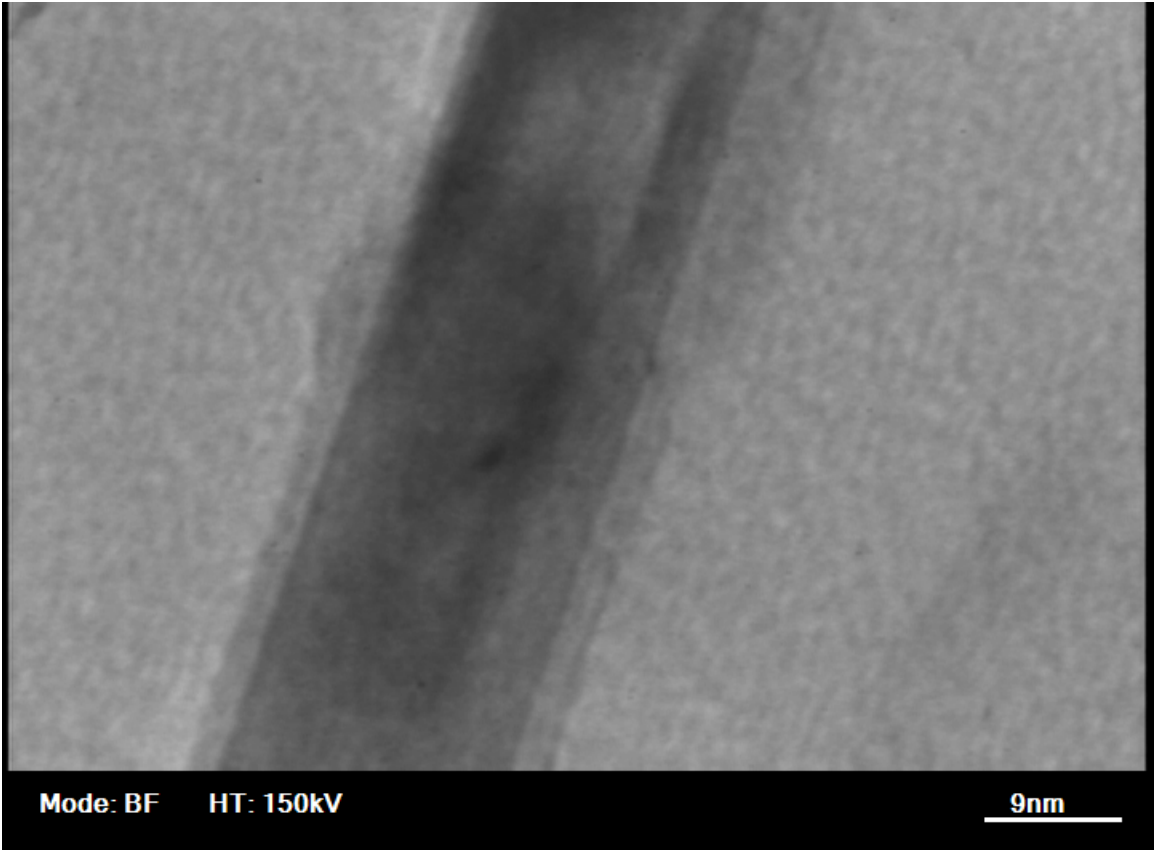

c

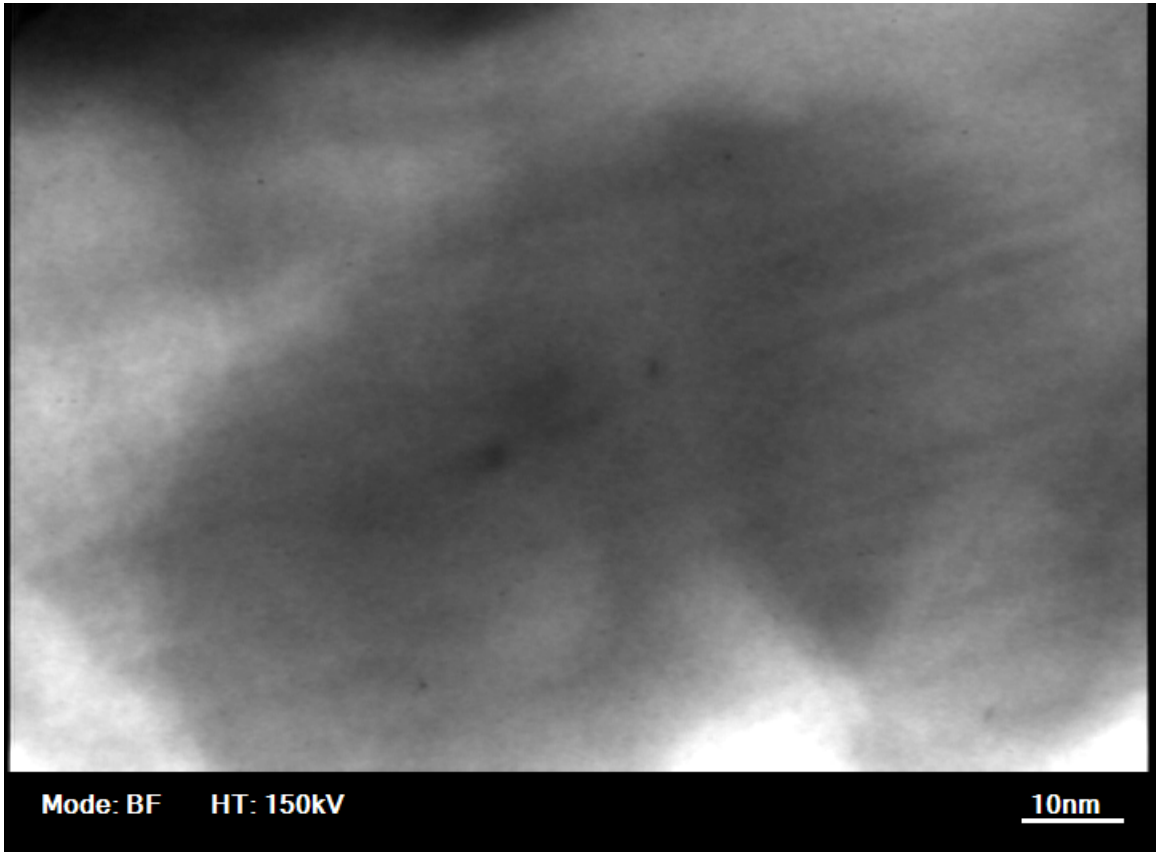

d

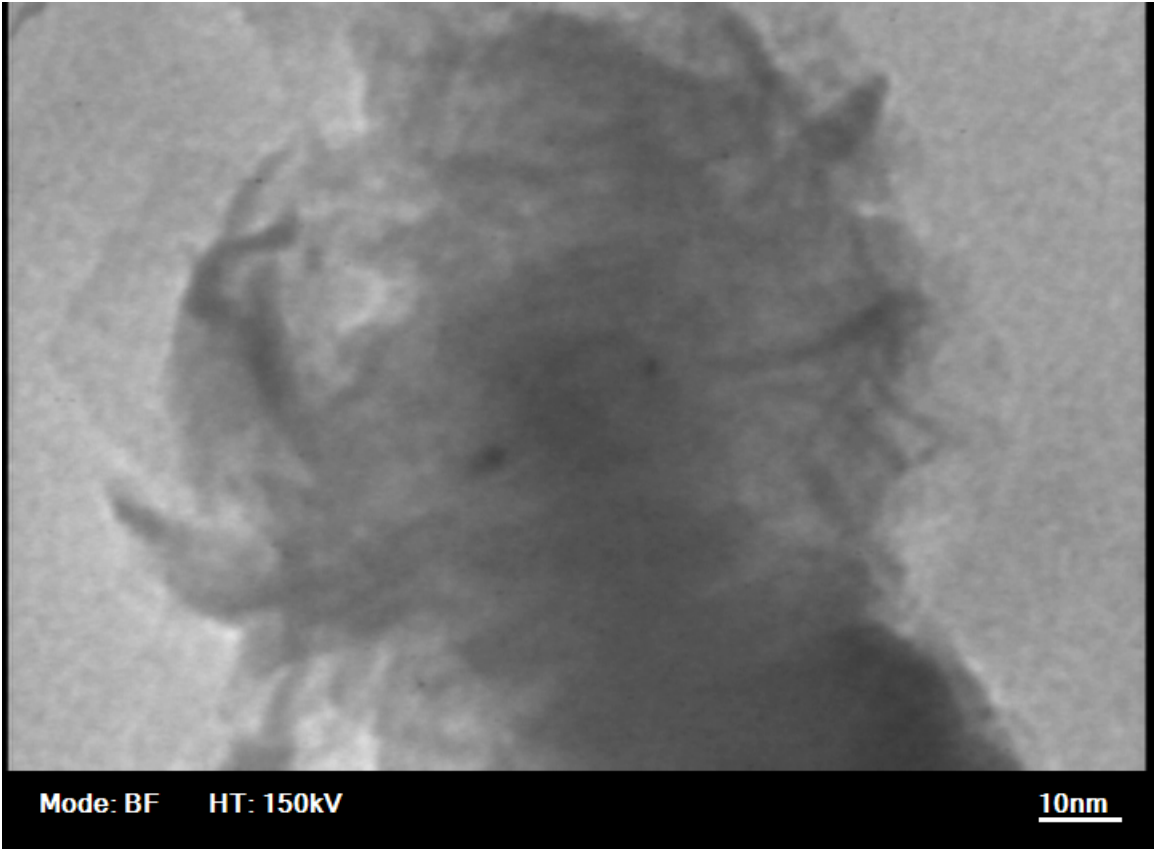

e

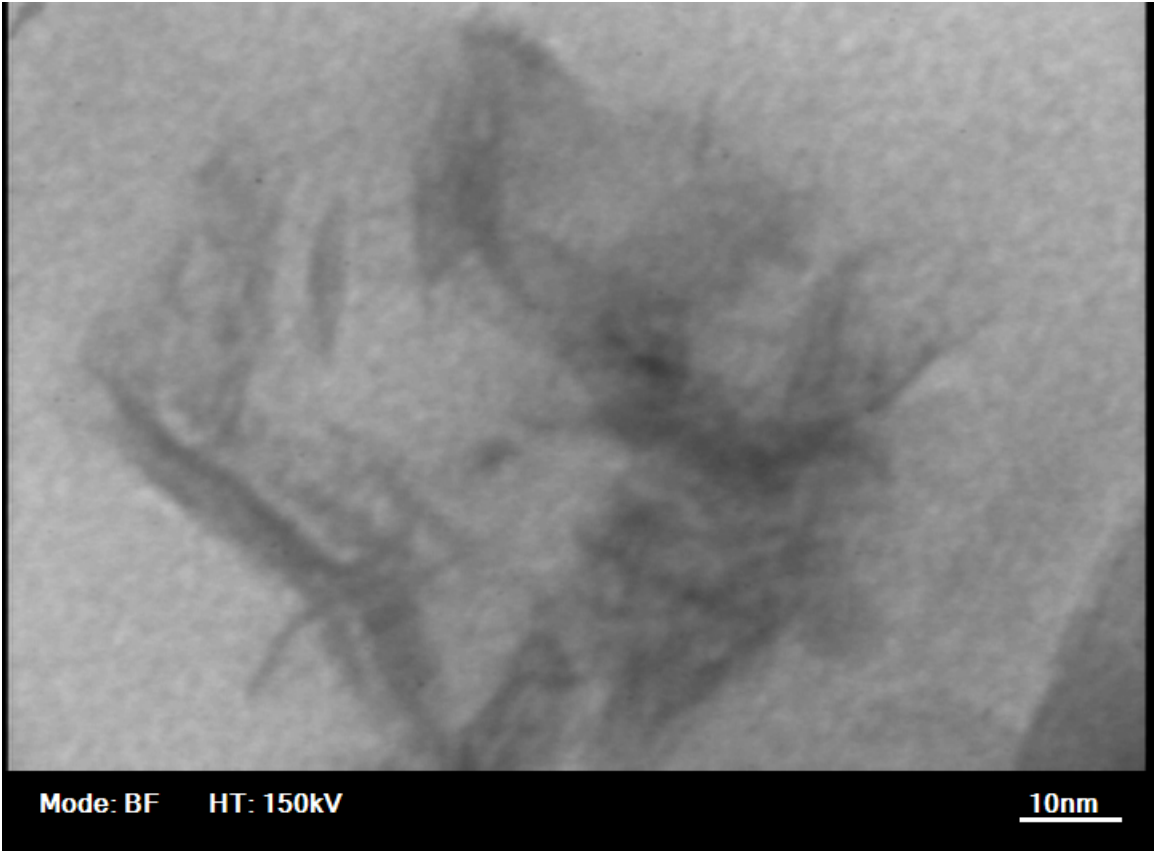

f

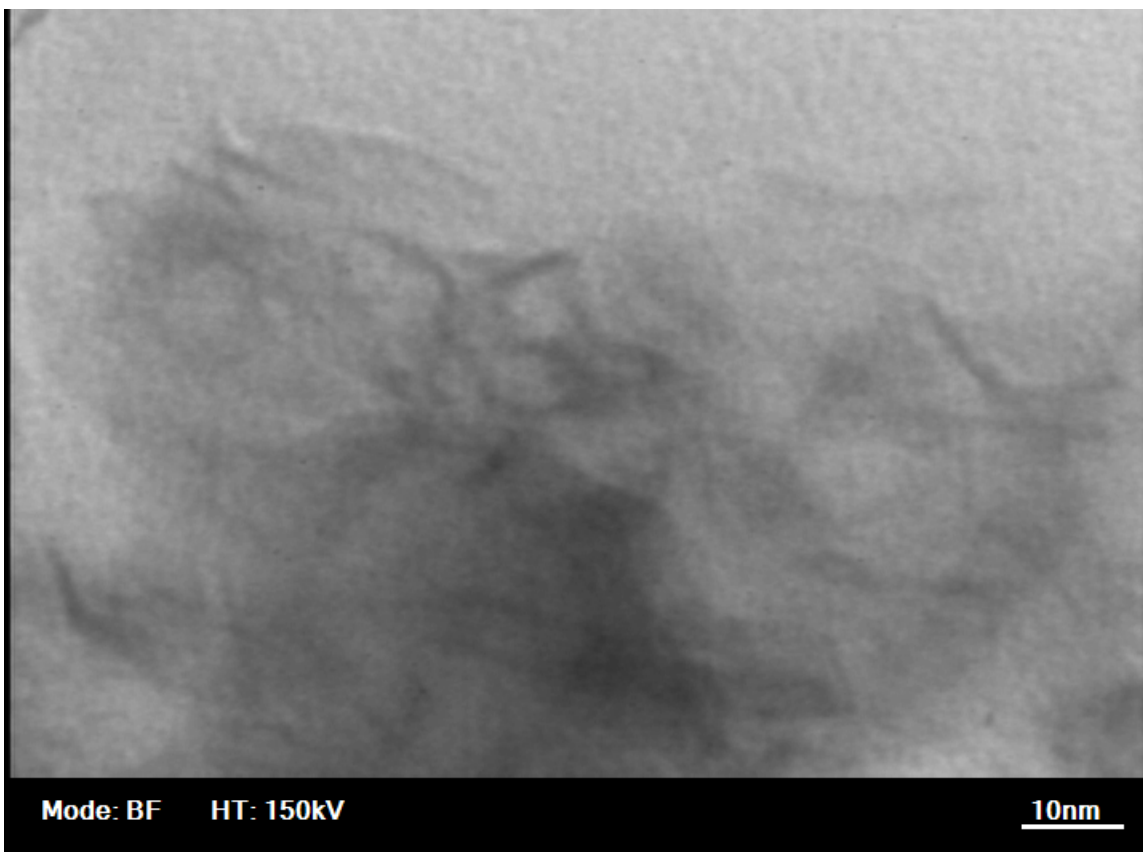

g

Fig. S2 TEM images from **1** (a-d) and **2** (e-g). other Mn oxides such as  $\text{Mn}_2\text{O}_3$  and  $\text{MnOOH}$  are observed in **1**. Rod morphology (diameter: 20-40 nm) related to  $\text{Mn}_2\text{O}_3$  and  $\text{MnOOH}$  are observed in TEM and HRTEM images of **1**. In **2**, only layered structure is observed.

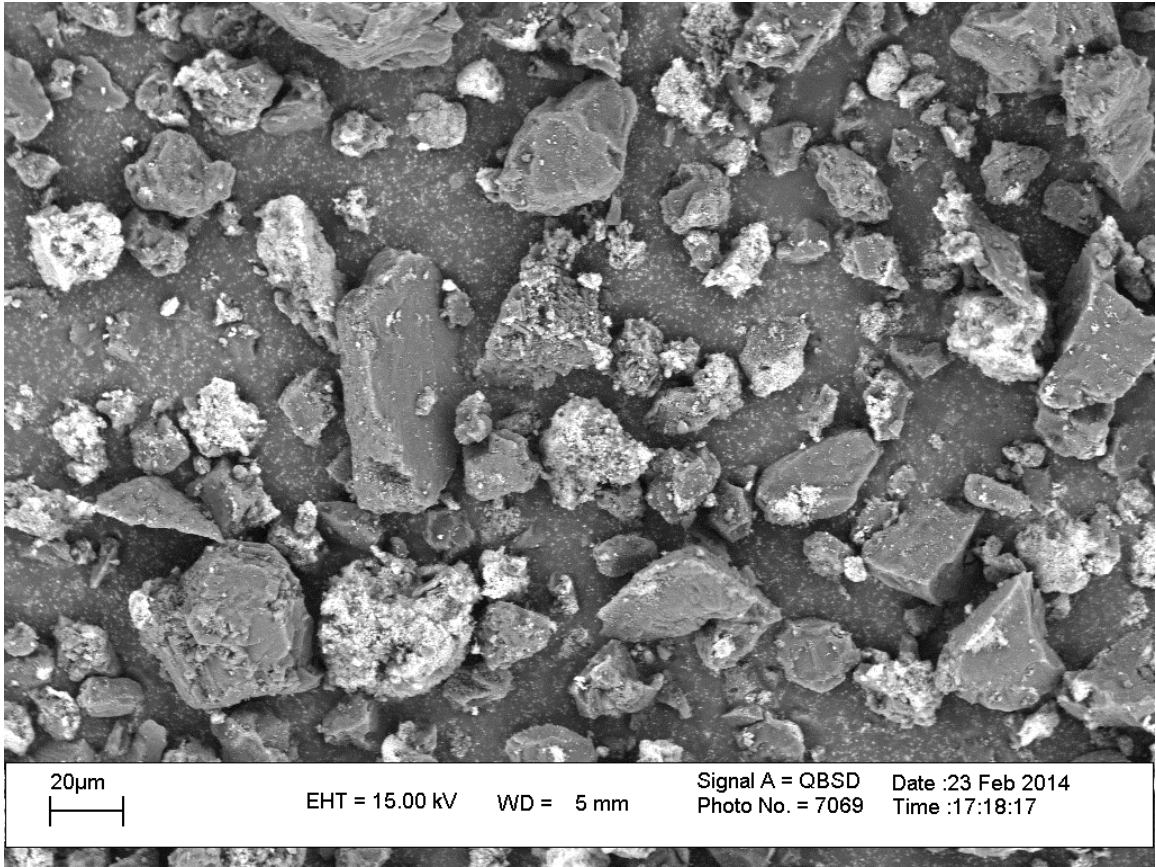

a

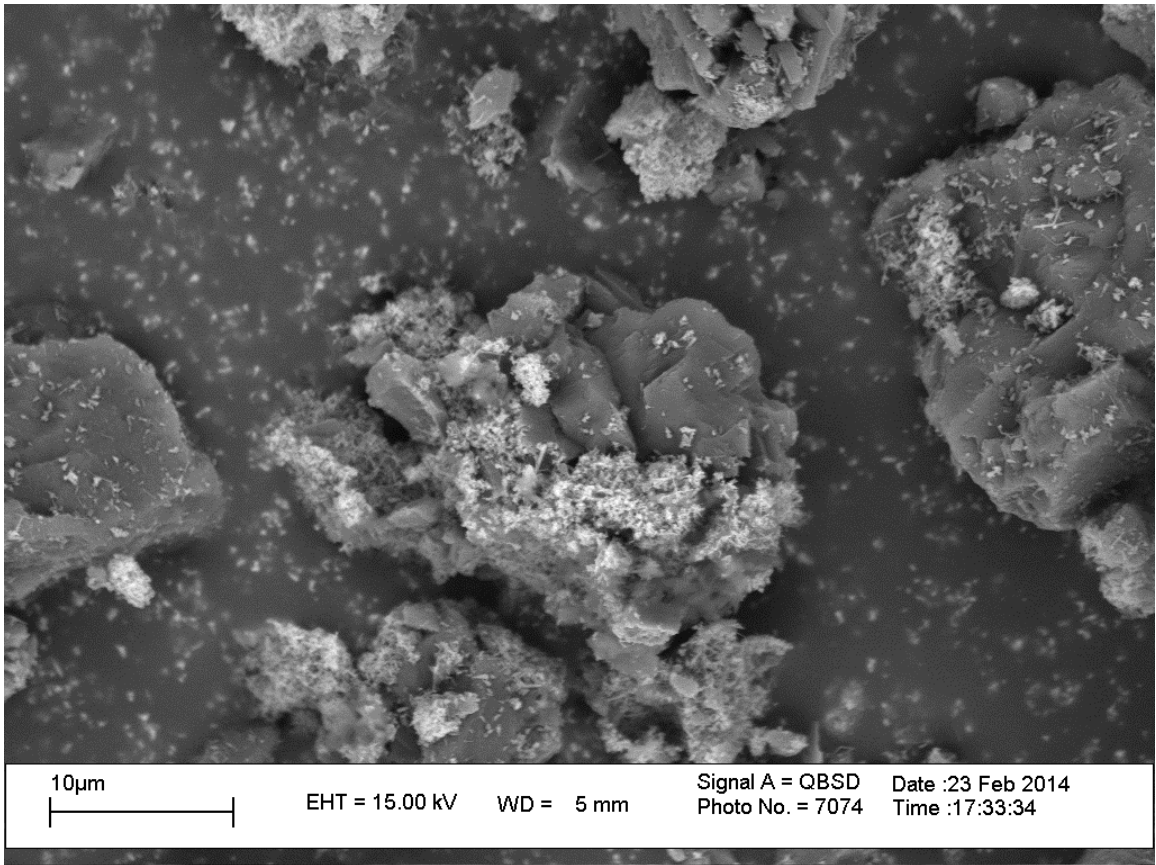

b

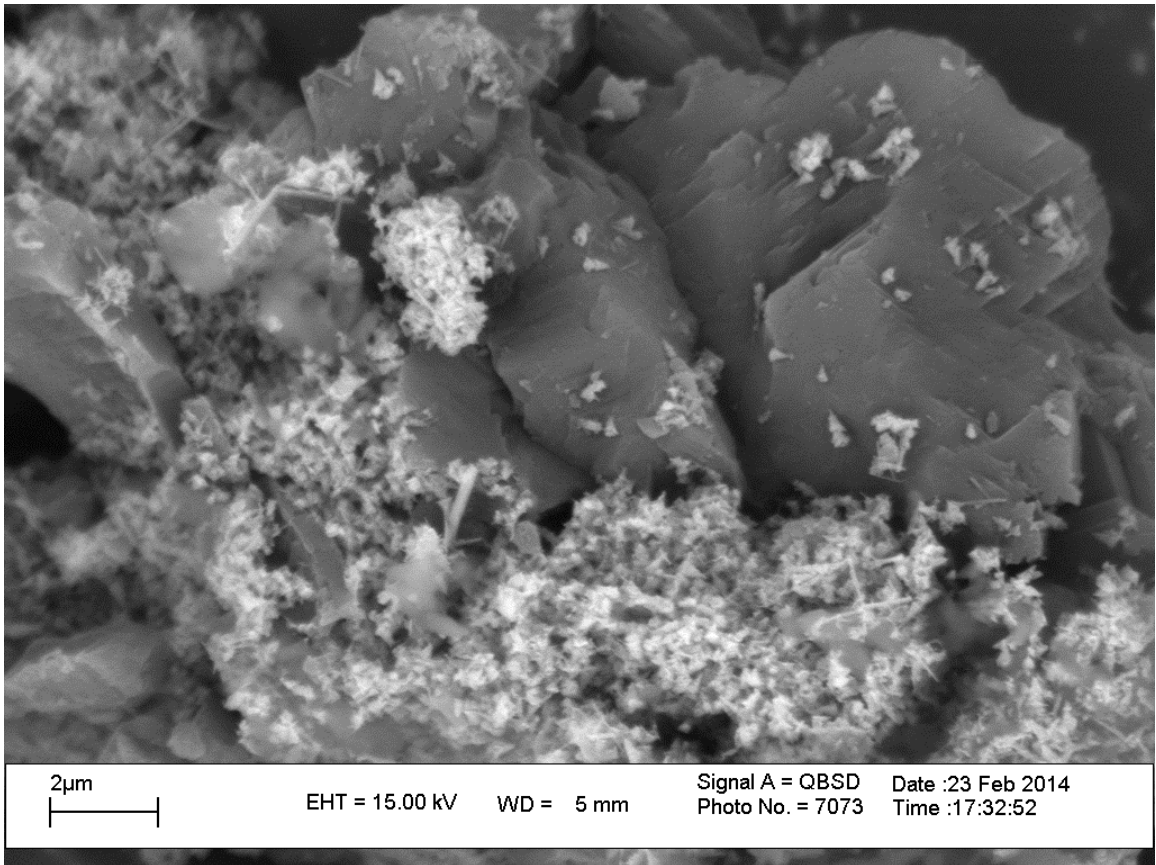

c



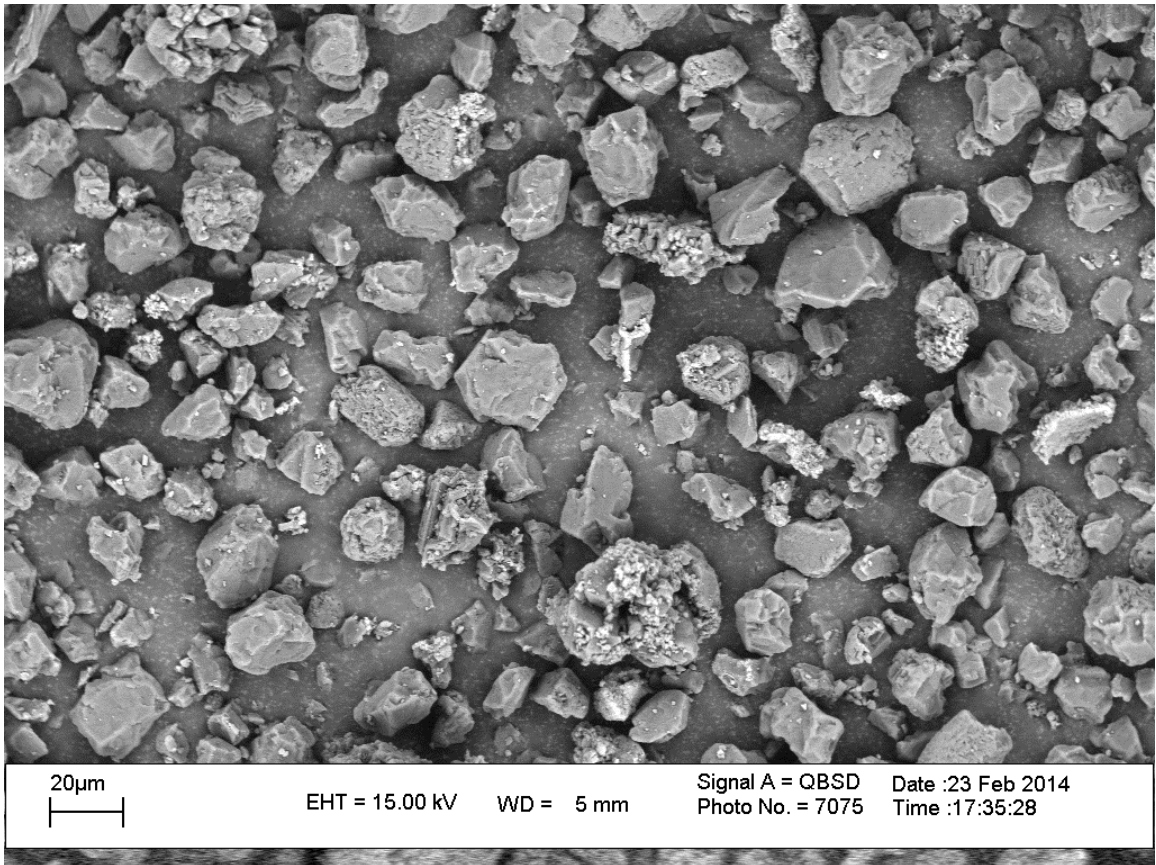

d

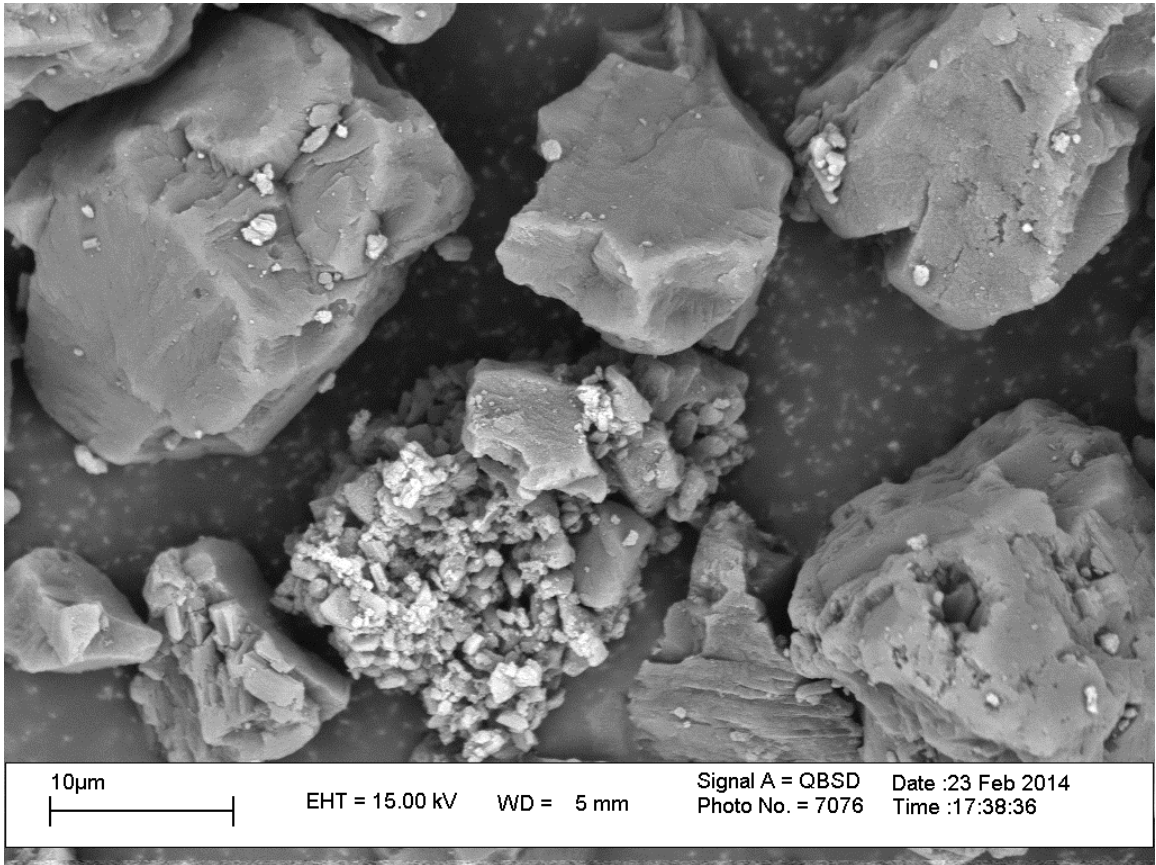

e

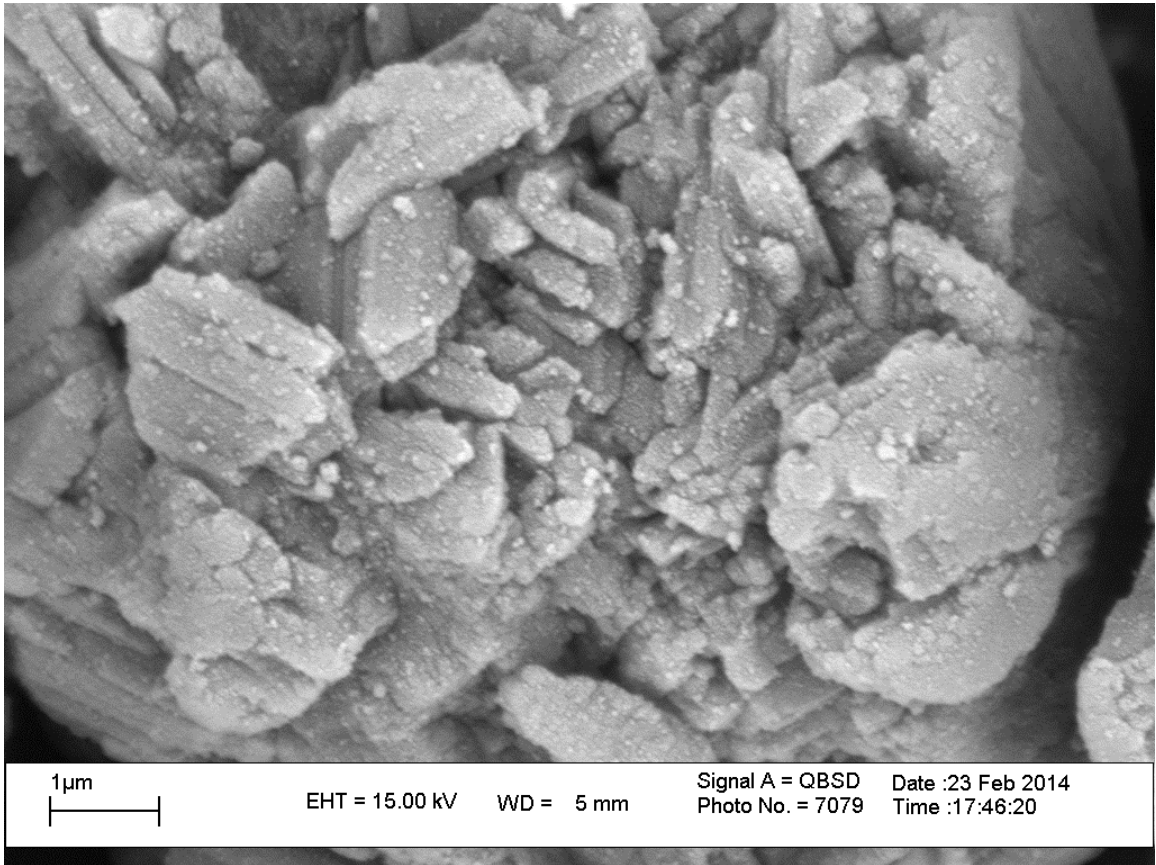

f

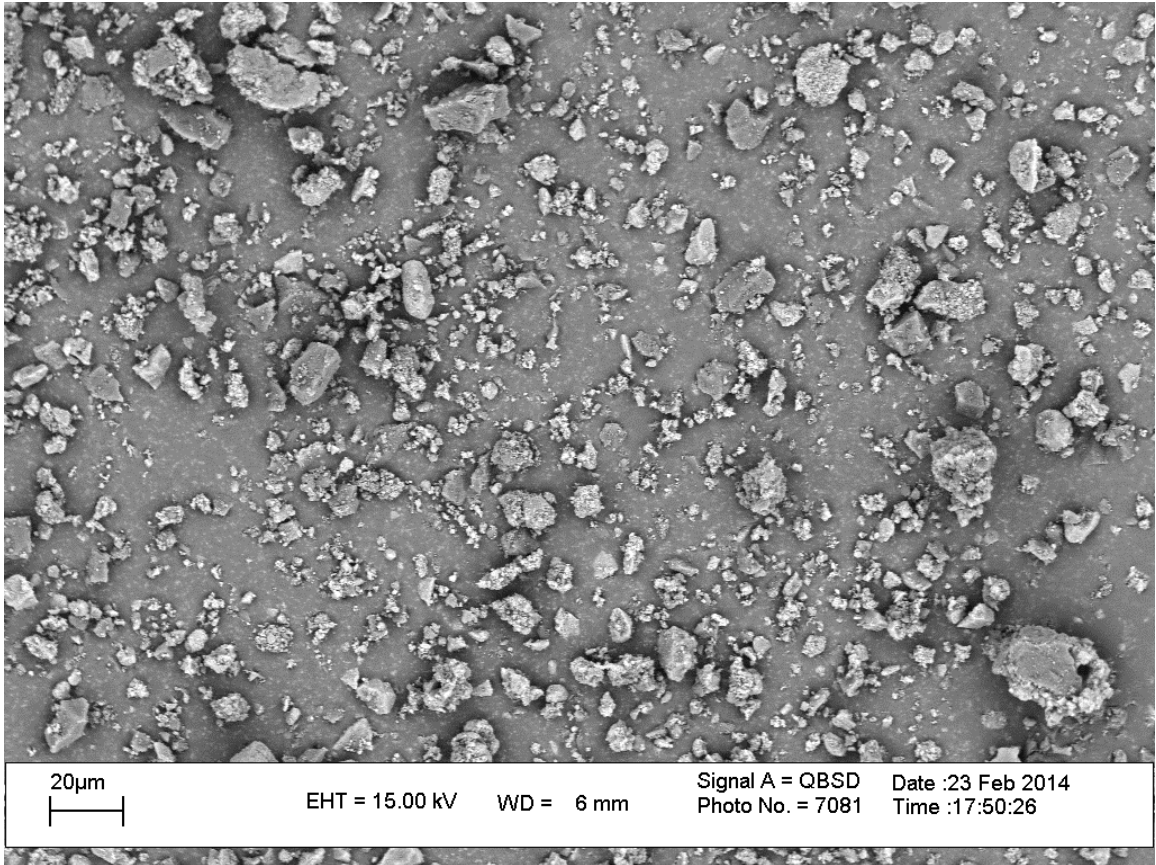

g

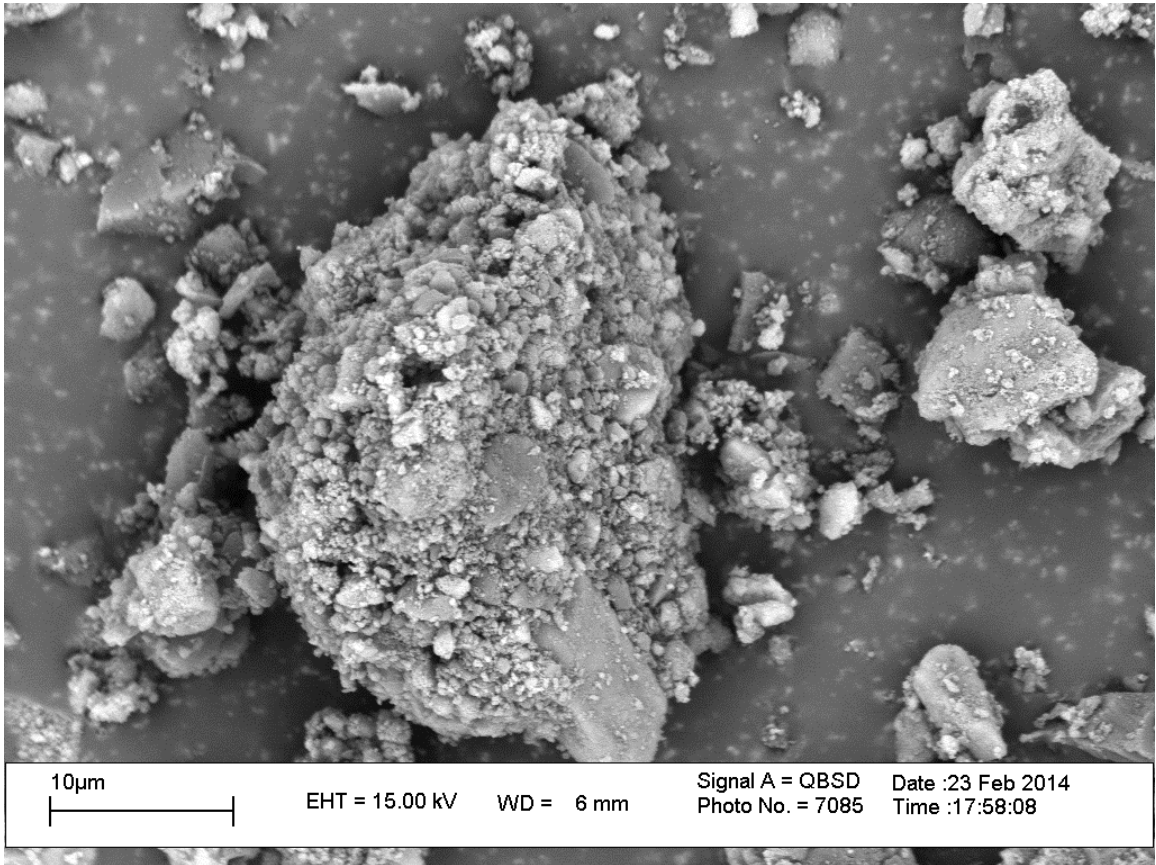

h

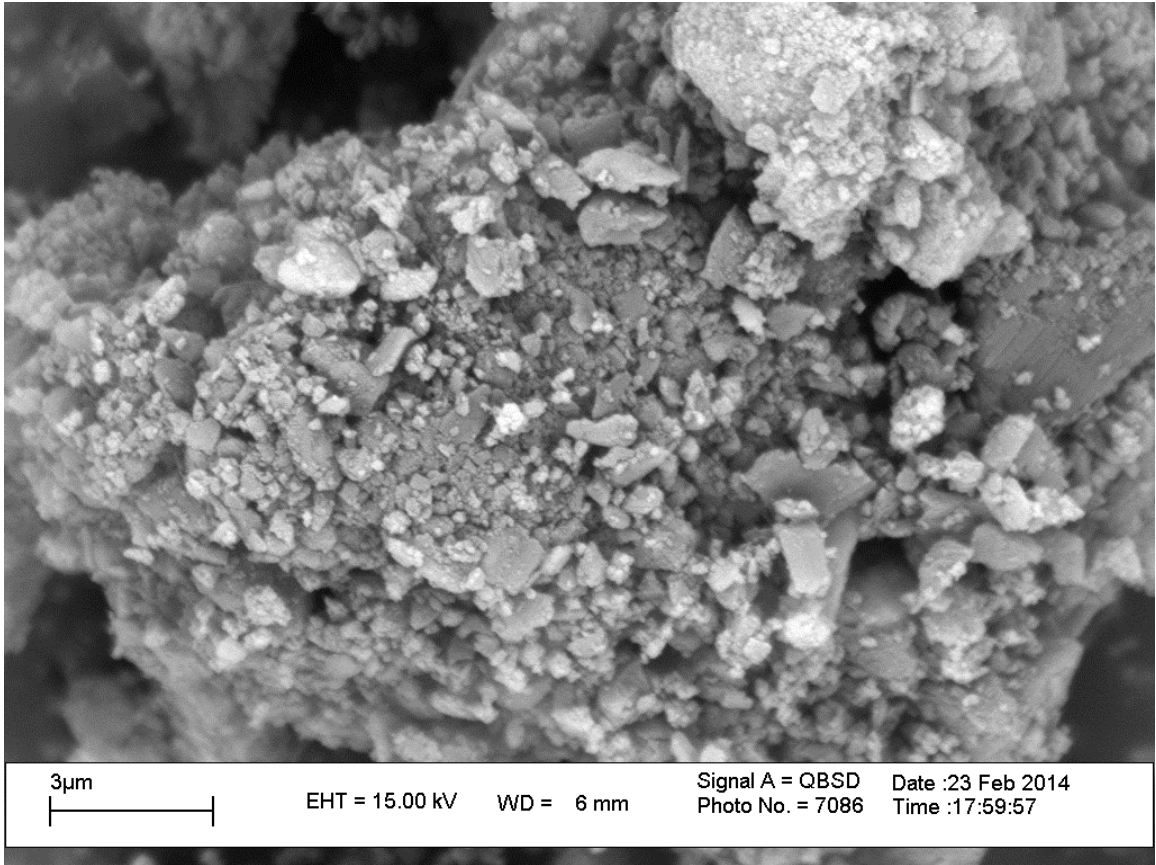

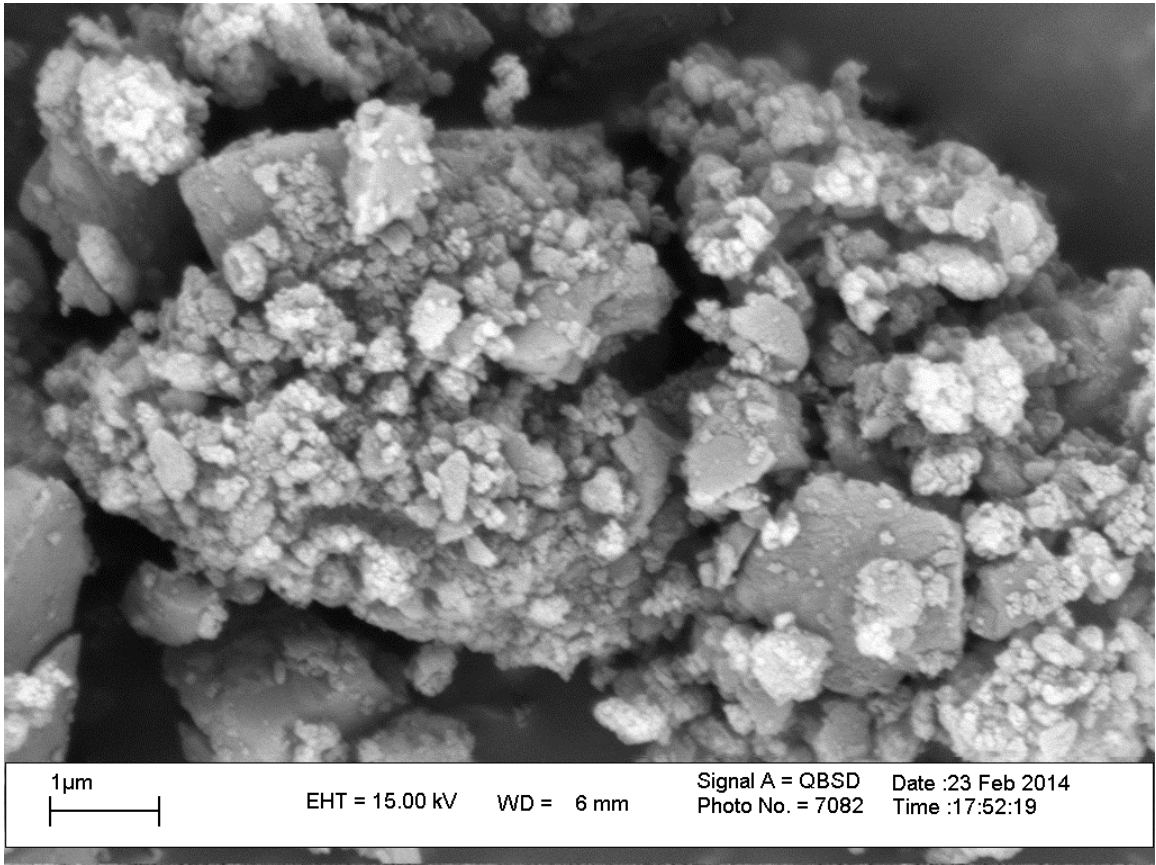

j

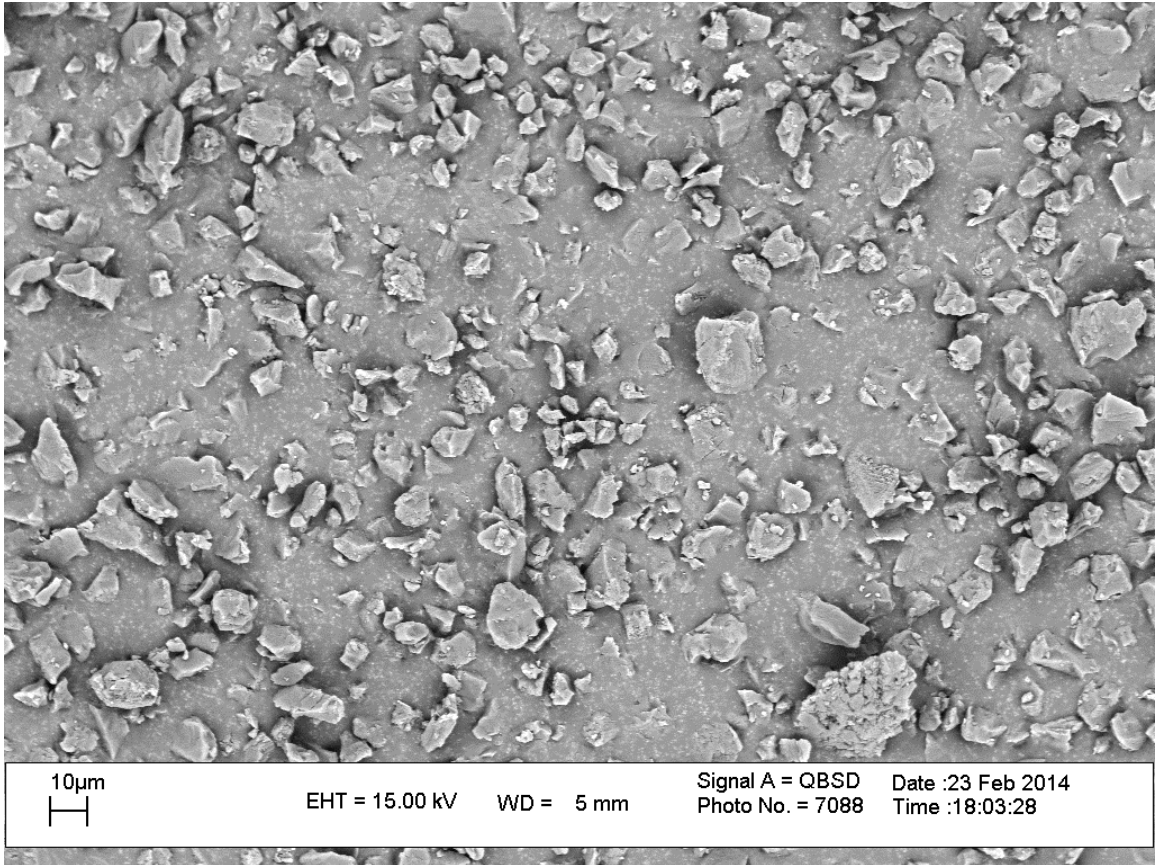

k



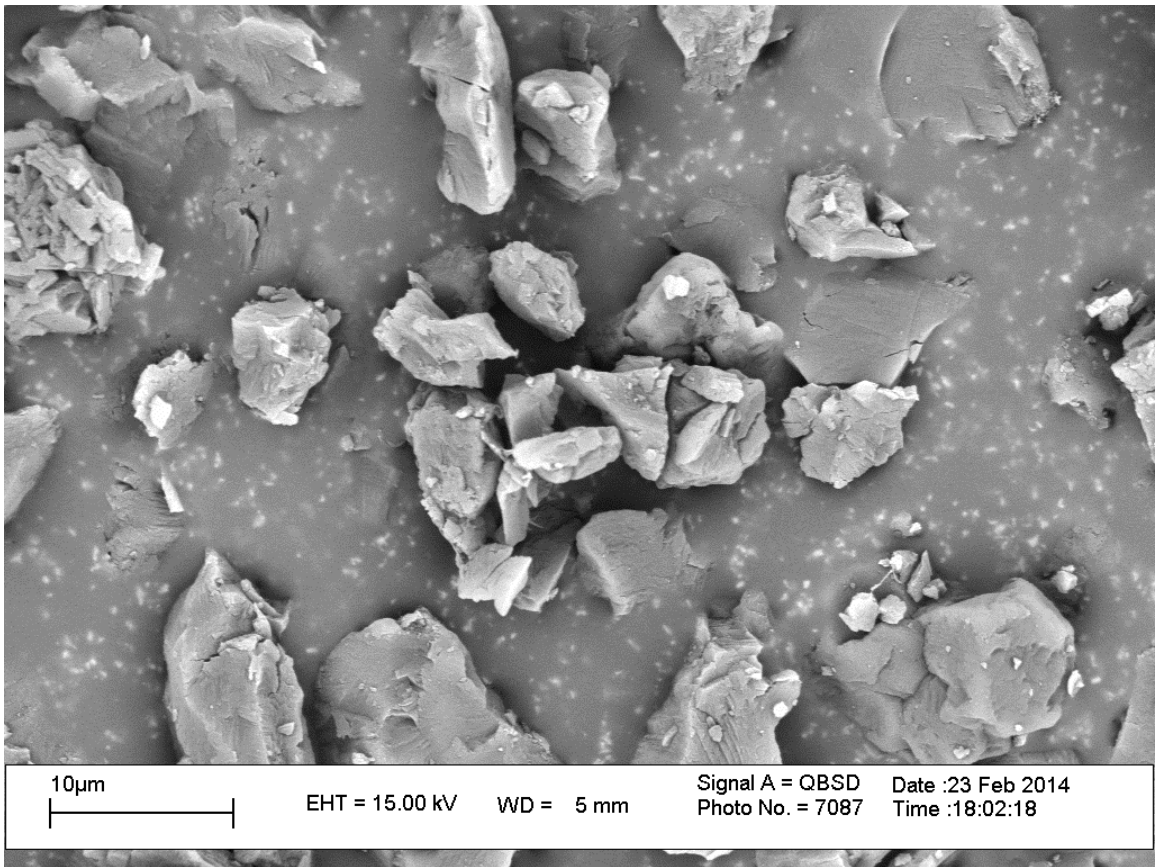

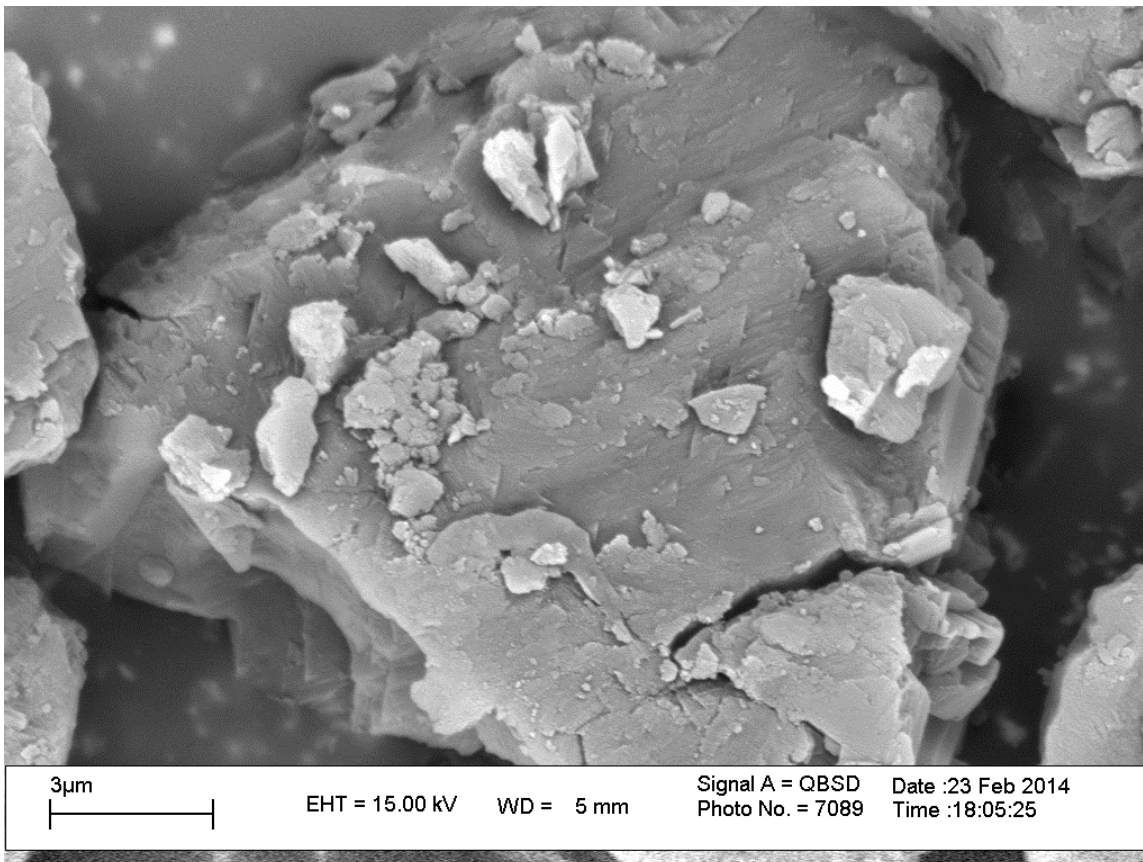

m

Fig. S3 SEM images of **1** (a-c), **2** (d-f), **3** (g-j) and **4** (k-m). In SEM images for **1**, rod morphology related to  $\text{Mn}_2\text{O}_3$  and  $\text{MnOOH}$  (diameter 20-40 nm) is observed. In **2**, small nano-structure Mn oxides ( $\sim 20$  nm) are observed that cover the surface of  $\text{C}_{60}$ . TEM and HRTEM images show that the nano-sized particles contain layers. In **3**, mixing Mn-Ca oxides (50-60 nm) and  $\text{C}_{60}$  are observed. In **4**, SEM images show no clear images from Mn oxide phase most probably because of very small particles prepared in the mild condition.

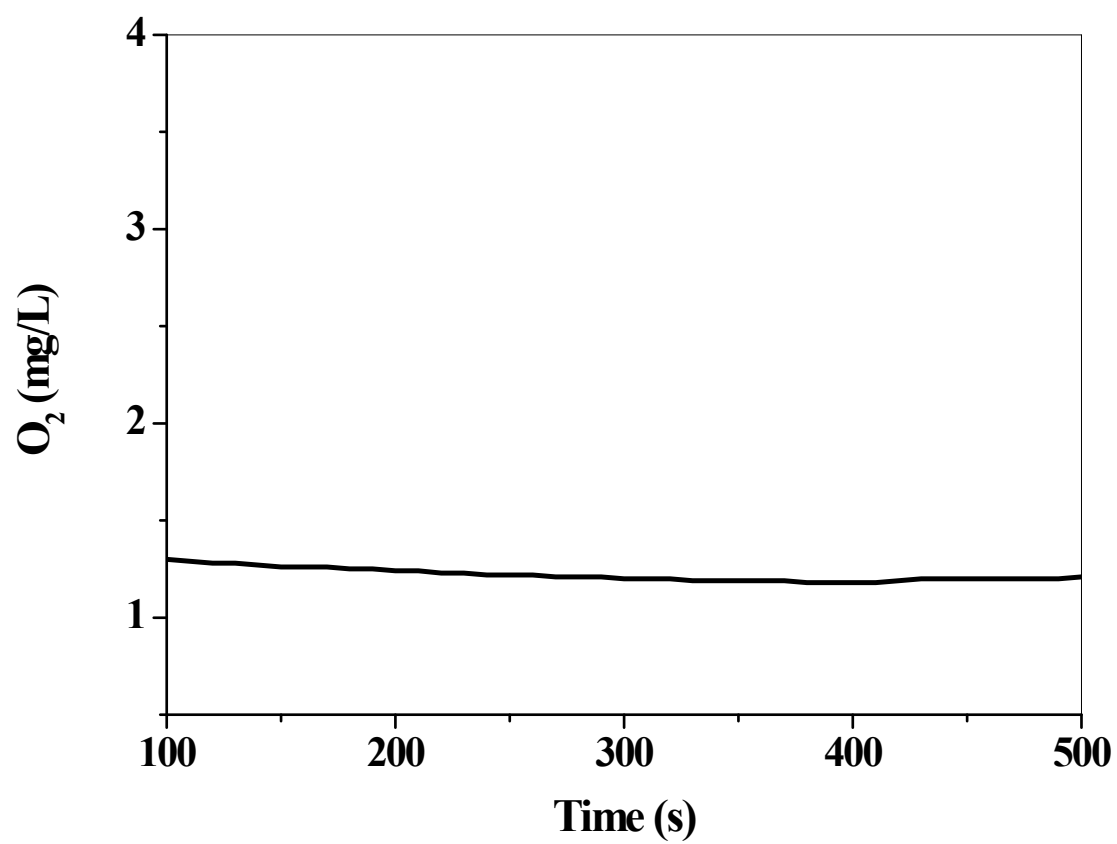

Fig. S4 The rate of oxygen evolution in the presence of only  $C_{60}$  (5 mg) ( $[Ce(IV)]: 0.22$  M).
